# Supplementary material
Source: publisher figshare collection journal article supplement (https://acs.figshare.com/ndownloader/files/3802768)
Supplement: Supplementary file 1 [file 3802768]

# **Low Cost Facile Synthesis of Large-Area Cobalt Hydroxide**

## **Nanorods with Remarkable Pseudocapacitance**

Ming-Jay Deng<sup>a\*†</sup>, Cheng-Zhao Song<sup>a,b†</sup>, Chien-Chia Wang<sup>a,b</sup>, Yuan-Chieh Tseng<sup>b</sup>,

Jin-Ming Chen<sup>a\*</sup>, Kueih-Tzu Lu<sup>a\*</sup>

*<sup>a</sup>National Synchrotron Radiation Research Center (NSRRC), Hsinchu, Taiwan*

*<sup>b</sup> Department of Materials Science and Engineering, National Chiao Tung University,*

*Hsinchu, Taiwan*

E-mail: [deng.mj@nsrrc.org.tw](mailto:deng.mj@nsrrc.org.tw) or [martinez730523@yahoo.com.tw](mailto:martinez730523@yahoo.com.tw) ;

[jmchen@nsrrc.org.tw](mailto:jmchen@nsrrc.org.tw); [ktlu@nsrrc.org.tw](mailto:ktlu@nsrrc.org.tw)

<sup>†</sup> These authors contributed equally to this work.

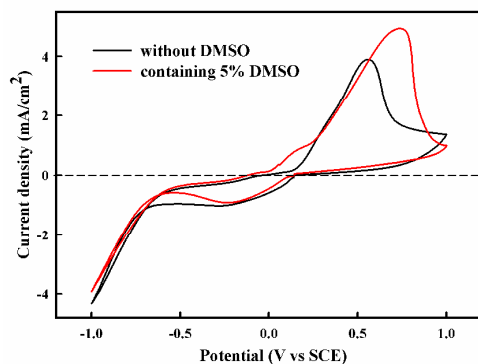

Figure S1. CV curves of the nickel foam electrode in a plating solution ( $\text{NiSO}_4$  0.5 M,  $\text{NiCl}_2$  0.5 M,  $\text{CuSO}_4$  0.01 M,  $\text{H}_3\text{BO}_3$  1 M, containing DMSO 5%, or without DMSO).

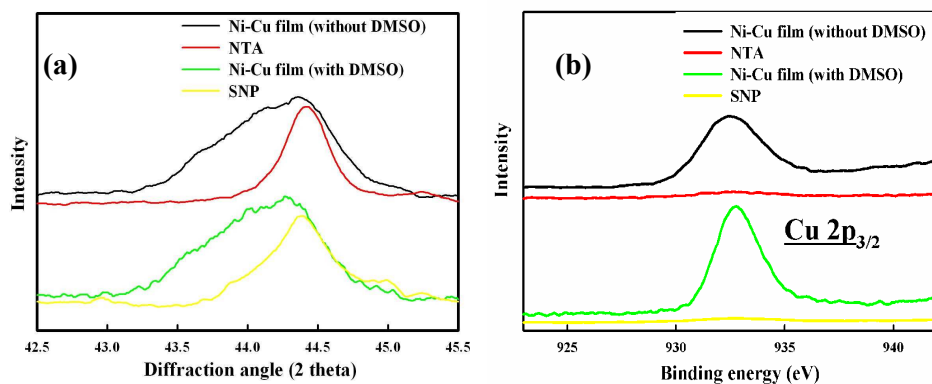

Figure S2. (a) X-ray diffraction patterns of Ni–Cu films deposited in solution (without and with DMSO) before and after etching Cu. (b)  $\text{Cu } 2p_{3/2}$  XPS spectra recorded from the Ni–Cu film as deposited at  $-0.78$  V, and the film etched at  $0.8$  V. The electrodeposition and selective dissolution were performed in a plating solution ( $\text{NiSO}_4$  0.5 M,  $\text{NiCl}_2$  0.5 M,  $\text{CuSO}_4$  0.01 M,  $\text{H}_3\text{BO}_3$  1 M, containing DMSO 5%, or without DMSO).

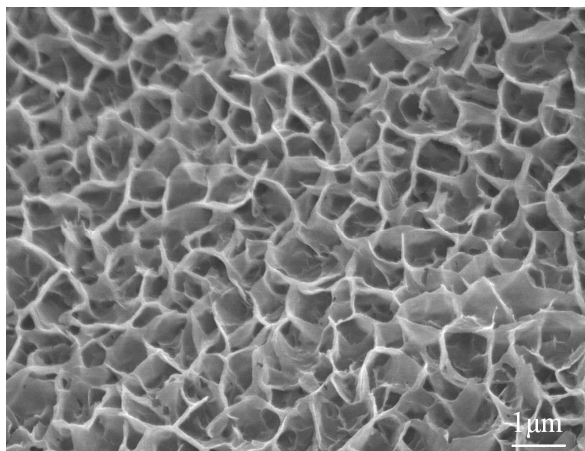

Figure S3. SEM images of the  $\text{Co(OH)}_2$  nanoflakes grown on nickel foam.

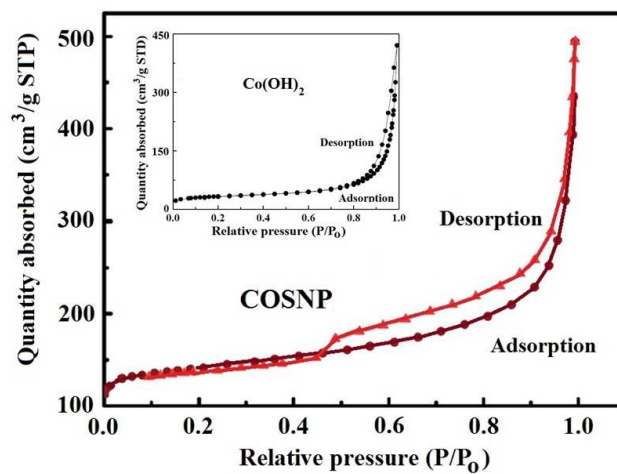

Figure S4. Nitrogen adsorption and desorption isotherms measured at standard temperature and pressure on the COSNP electrode; the inset shows the  $\text{Co(OH)}_2$  electrode.

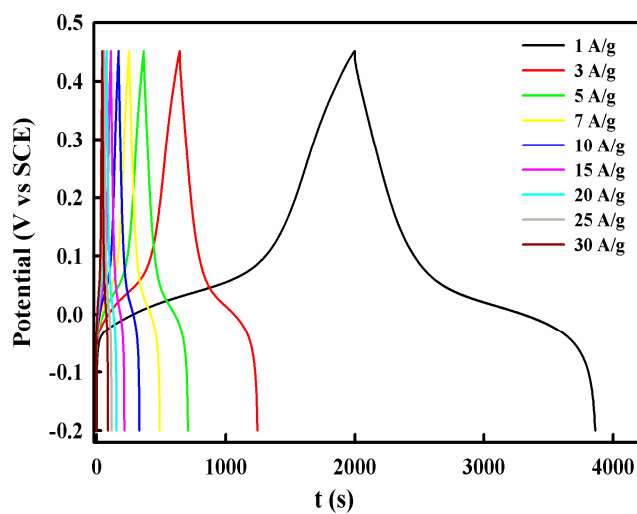

Figure S5. Galvanostatic charge–discharge curves of COSNP electrodes at various current densities (1 to 30 A g<sup>-1</sup>).

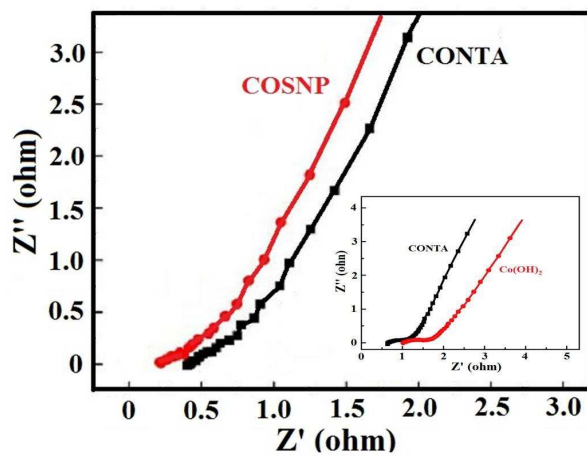

Figure S6. Nyquist plots of CONTA and COSNP electrodes; the inset shows the Nyquist plots of CONTA and Co(OH)<sub>2</sub> electrodes.

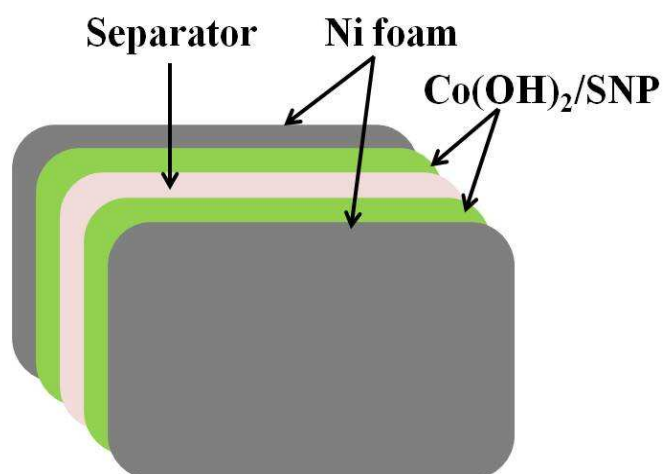

Figure S7. Schematic illustration of the symmetric supercapacitor based on the COSNP as electrodes configuration.
